# Supplementary material
Source: publisher figshare collection journal article supplement (https://springernature.figshare.com/ndownloader/files/13898870)

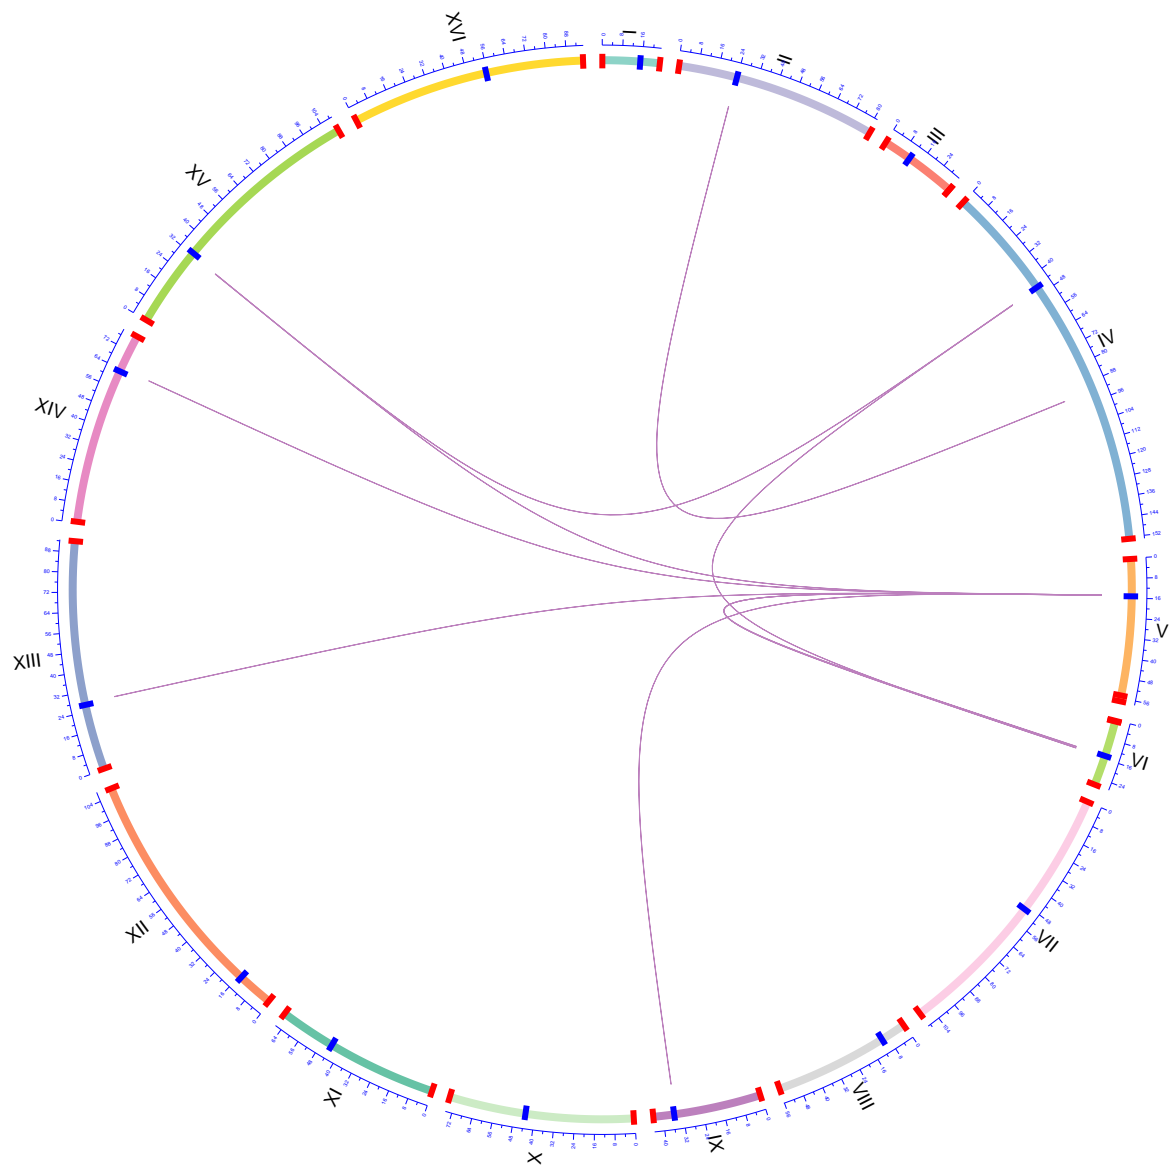

Supplement: Supplementary file 1 [file 13898870]

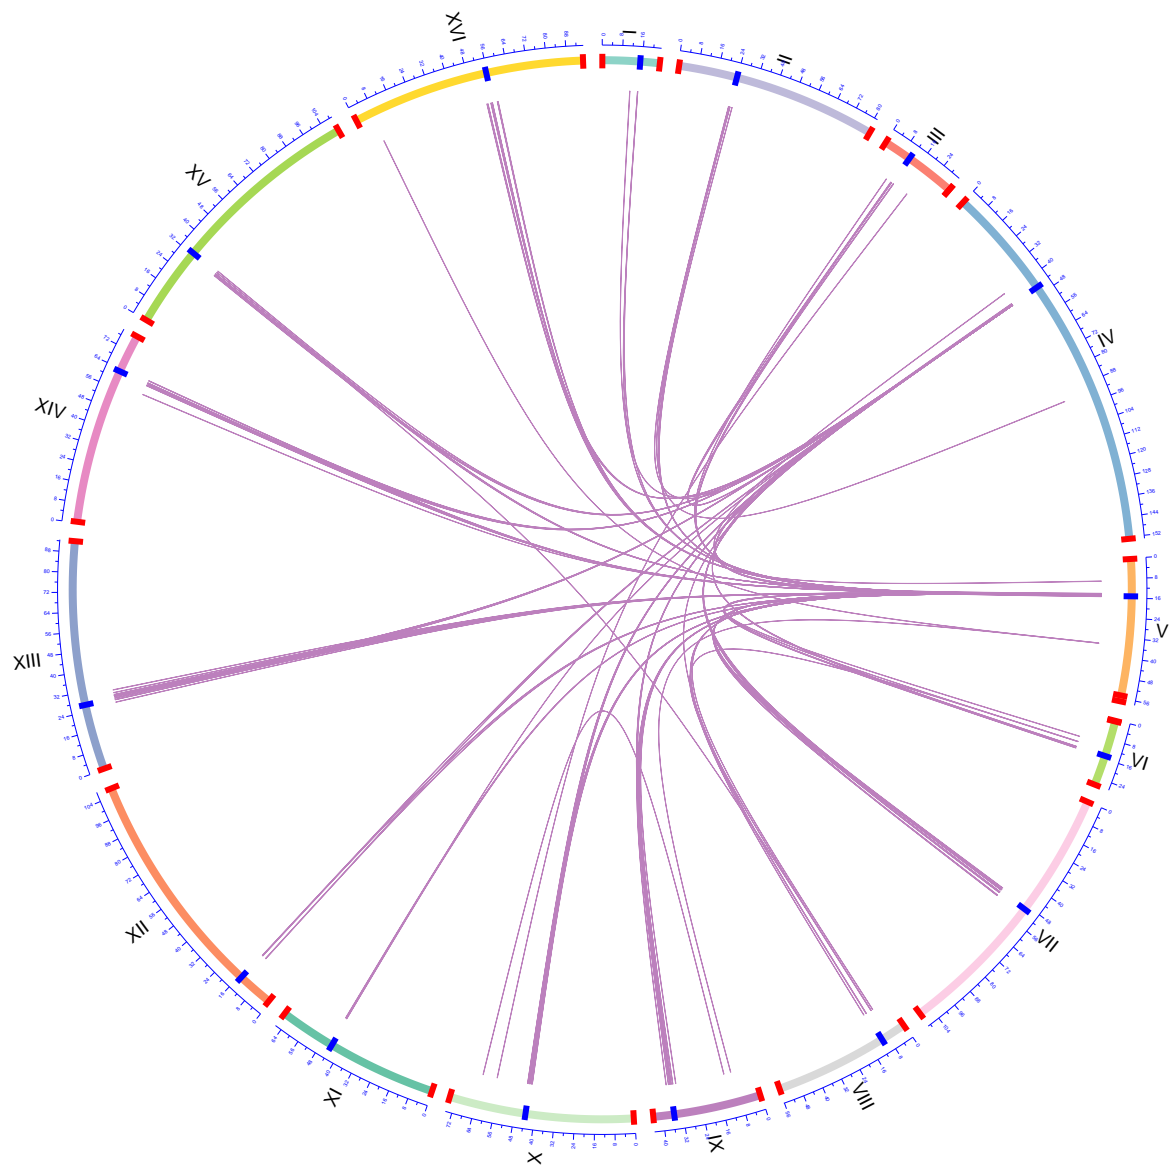

Supplement: Supplementary file 2 [file 13898870]

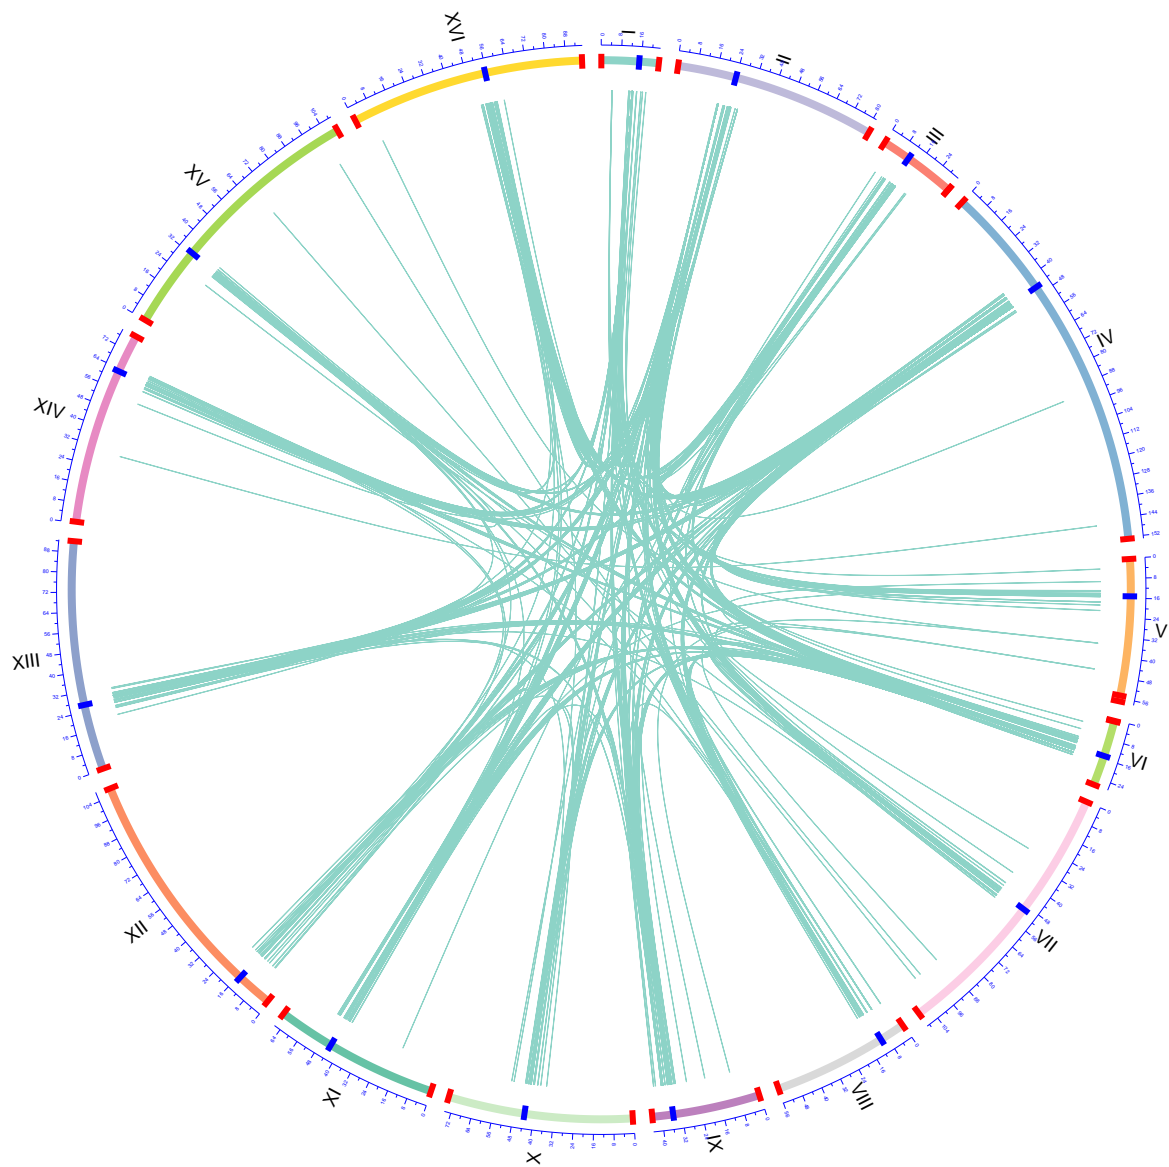

Supplement: Supplementary file 3 [file 13898870]

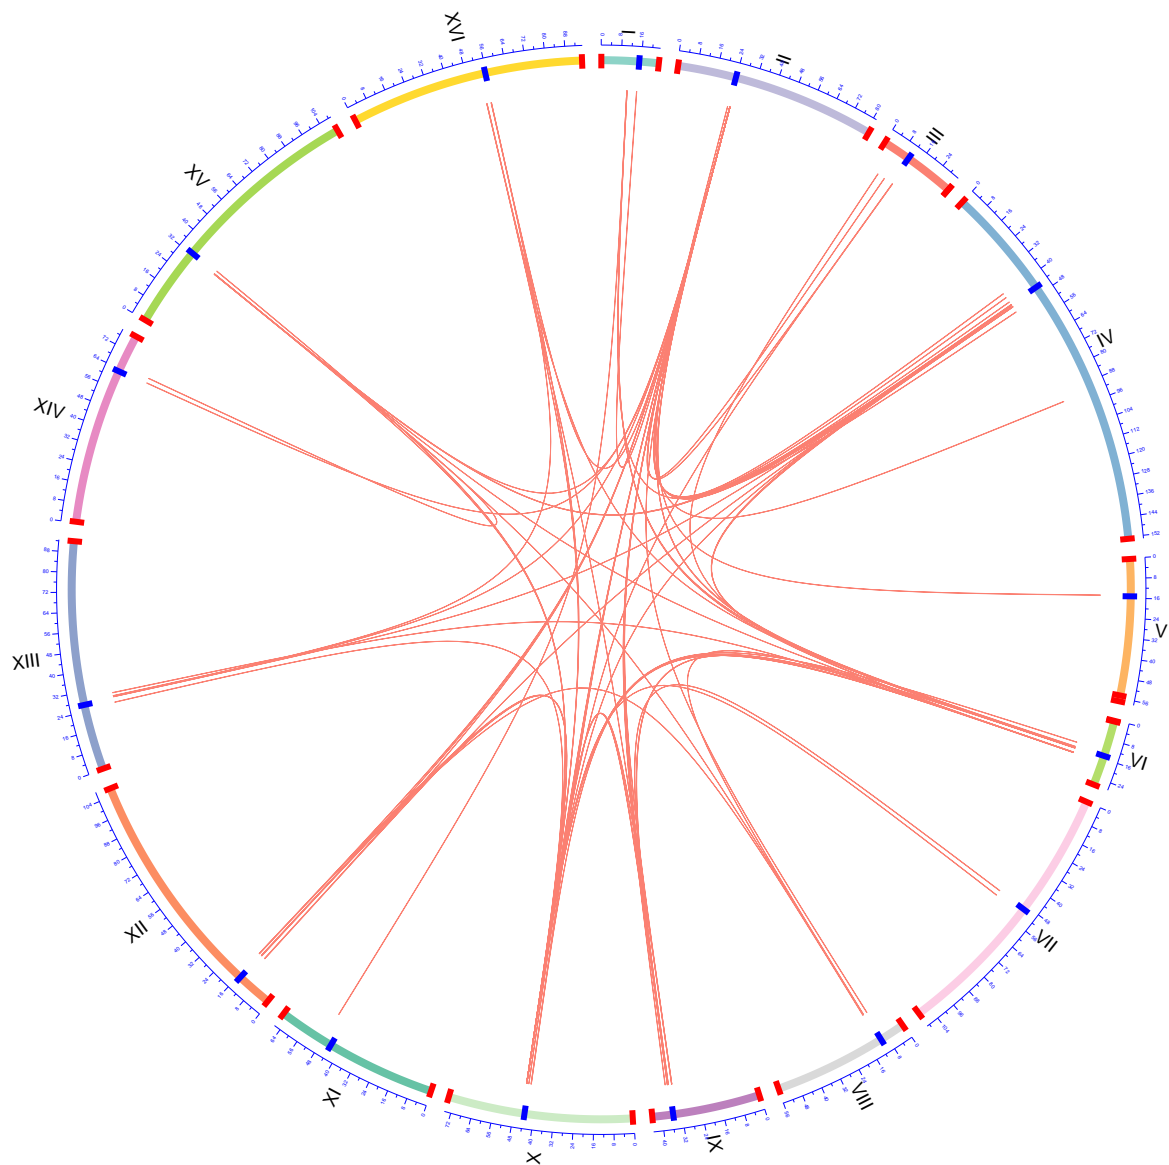

Supplement: Supplementary file 4 [file 13898870]

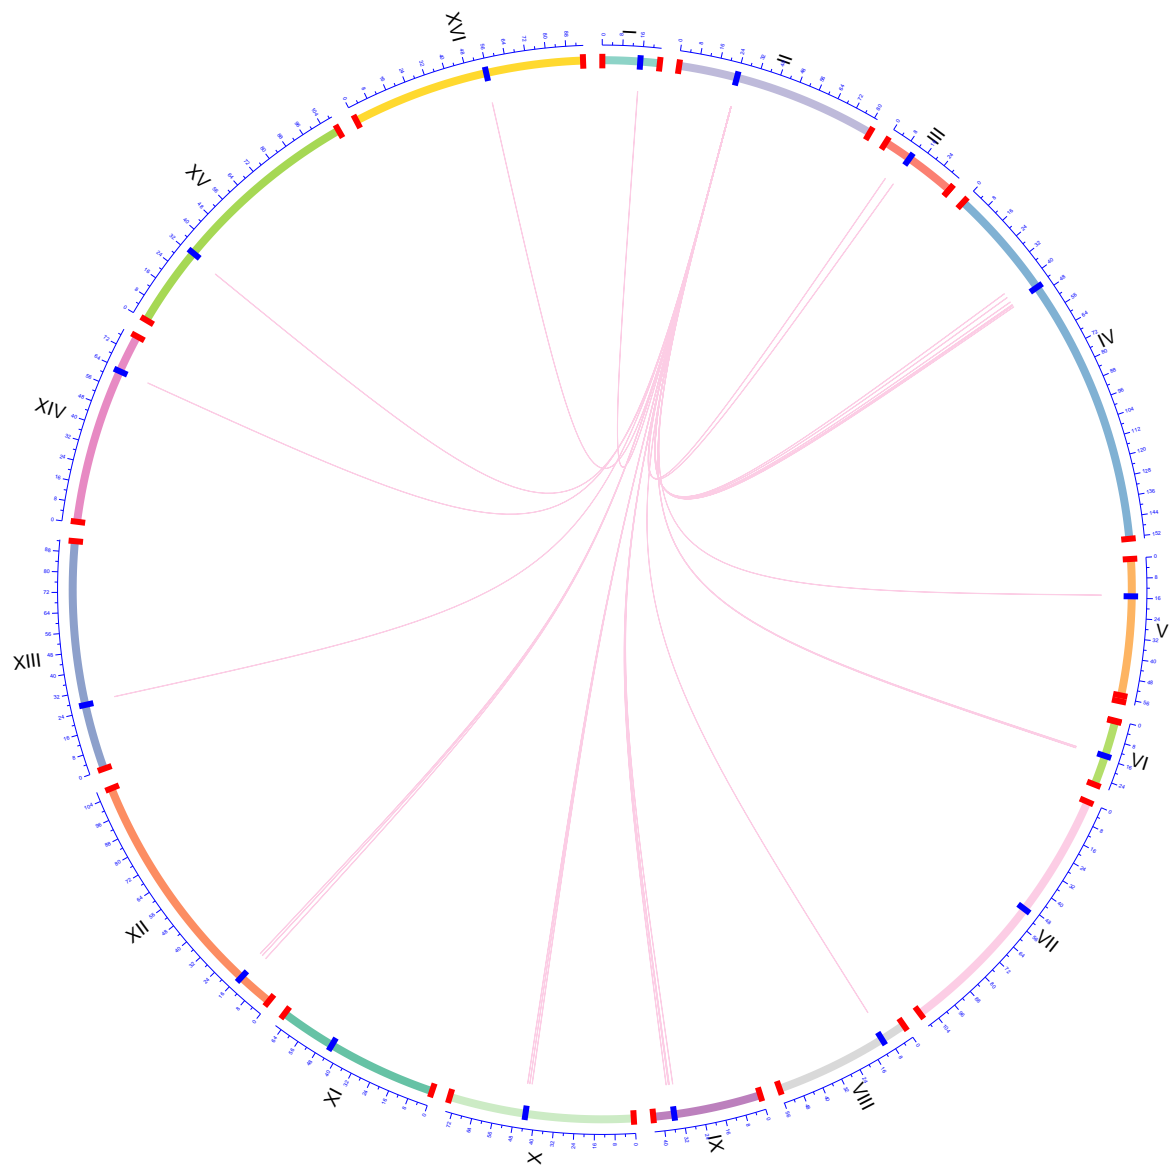

Supplement: Supplementary file 5 [file 13898870]

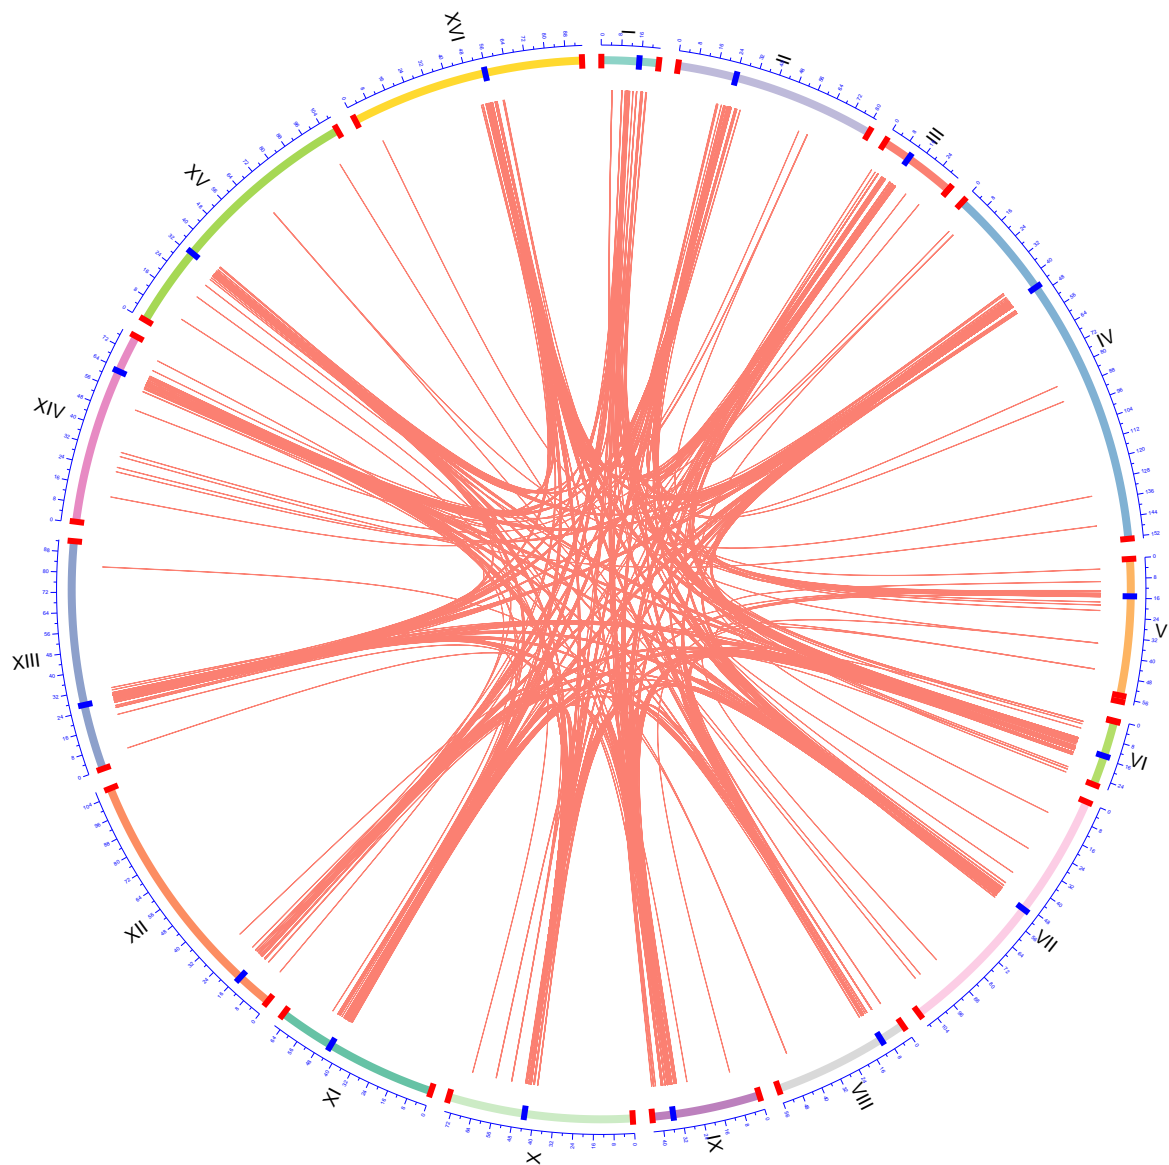

Supplement: Supplementary file 6 [file 13898870]

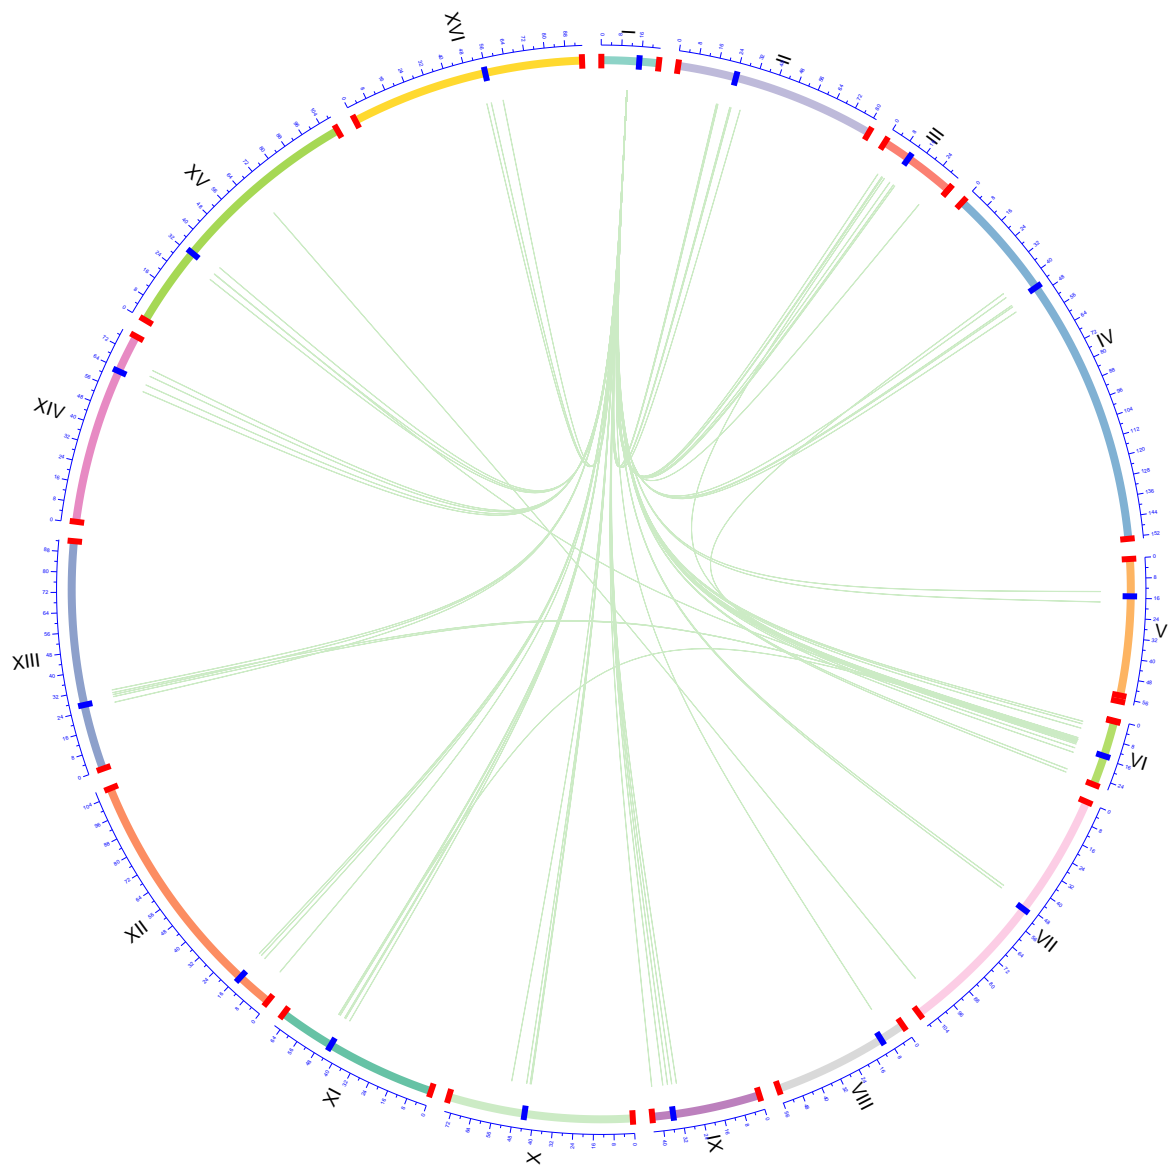

Supplement: Supplementary file 7 [file 13898870]

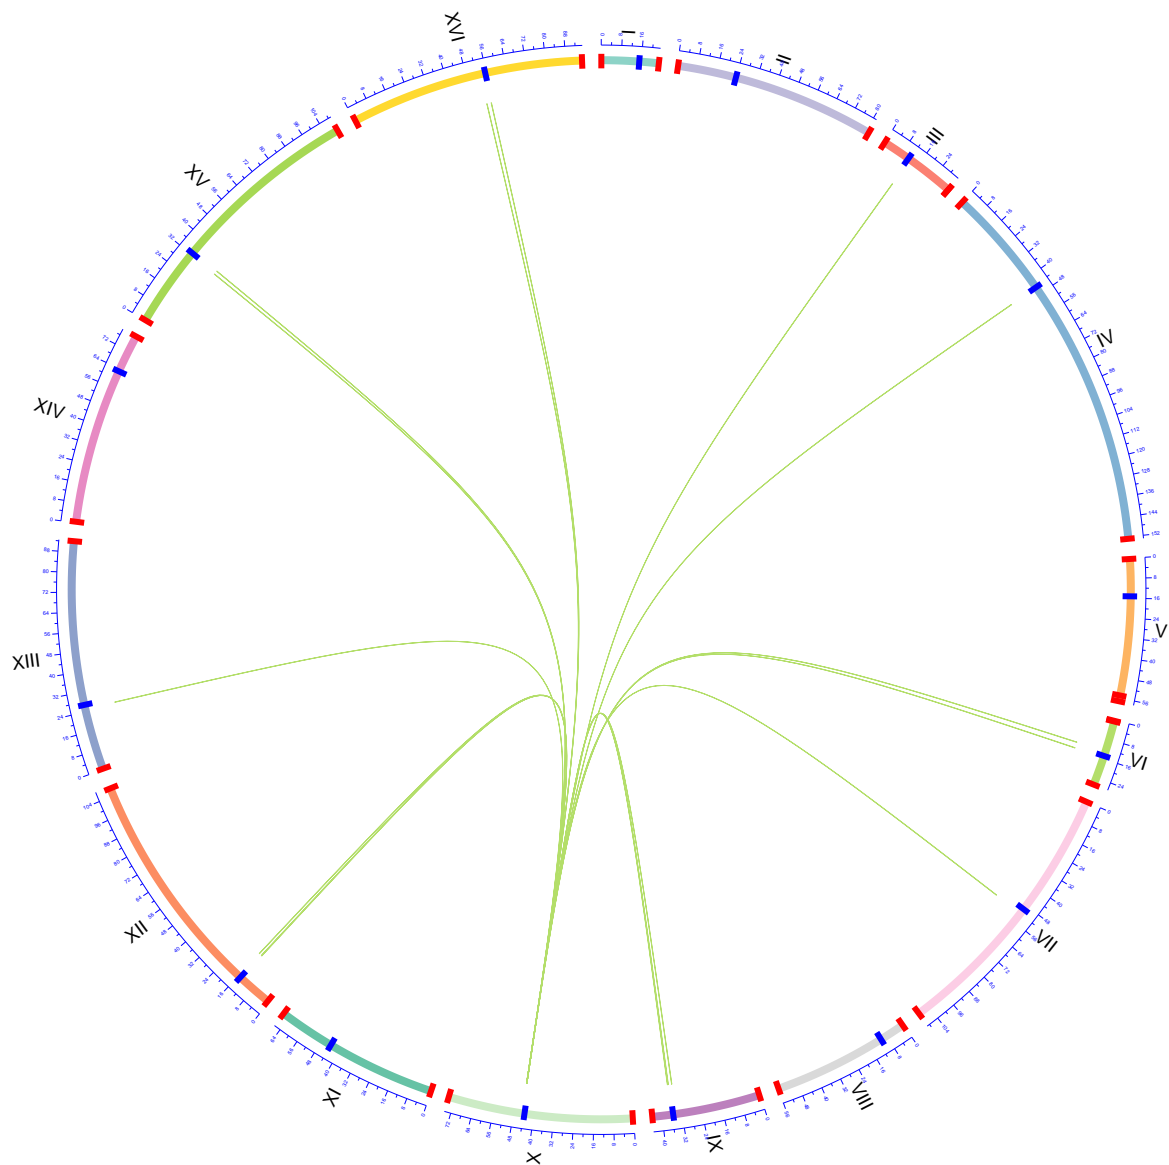

Supplement: Supplementary file 8 [file 13898870]

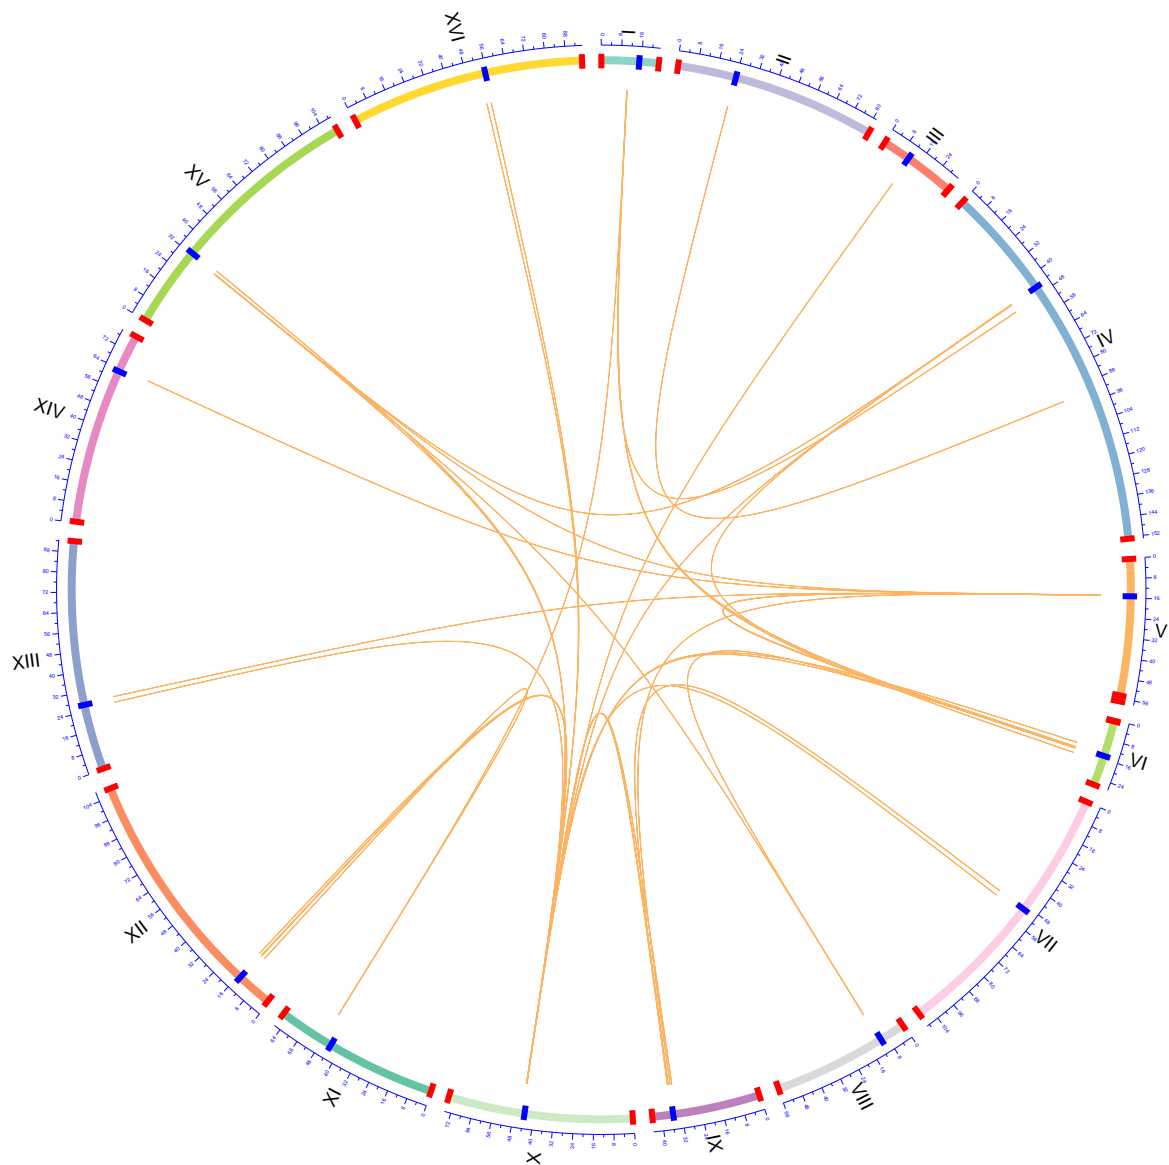

Supplement: Supplementary file 9 [file 13898870]

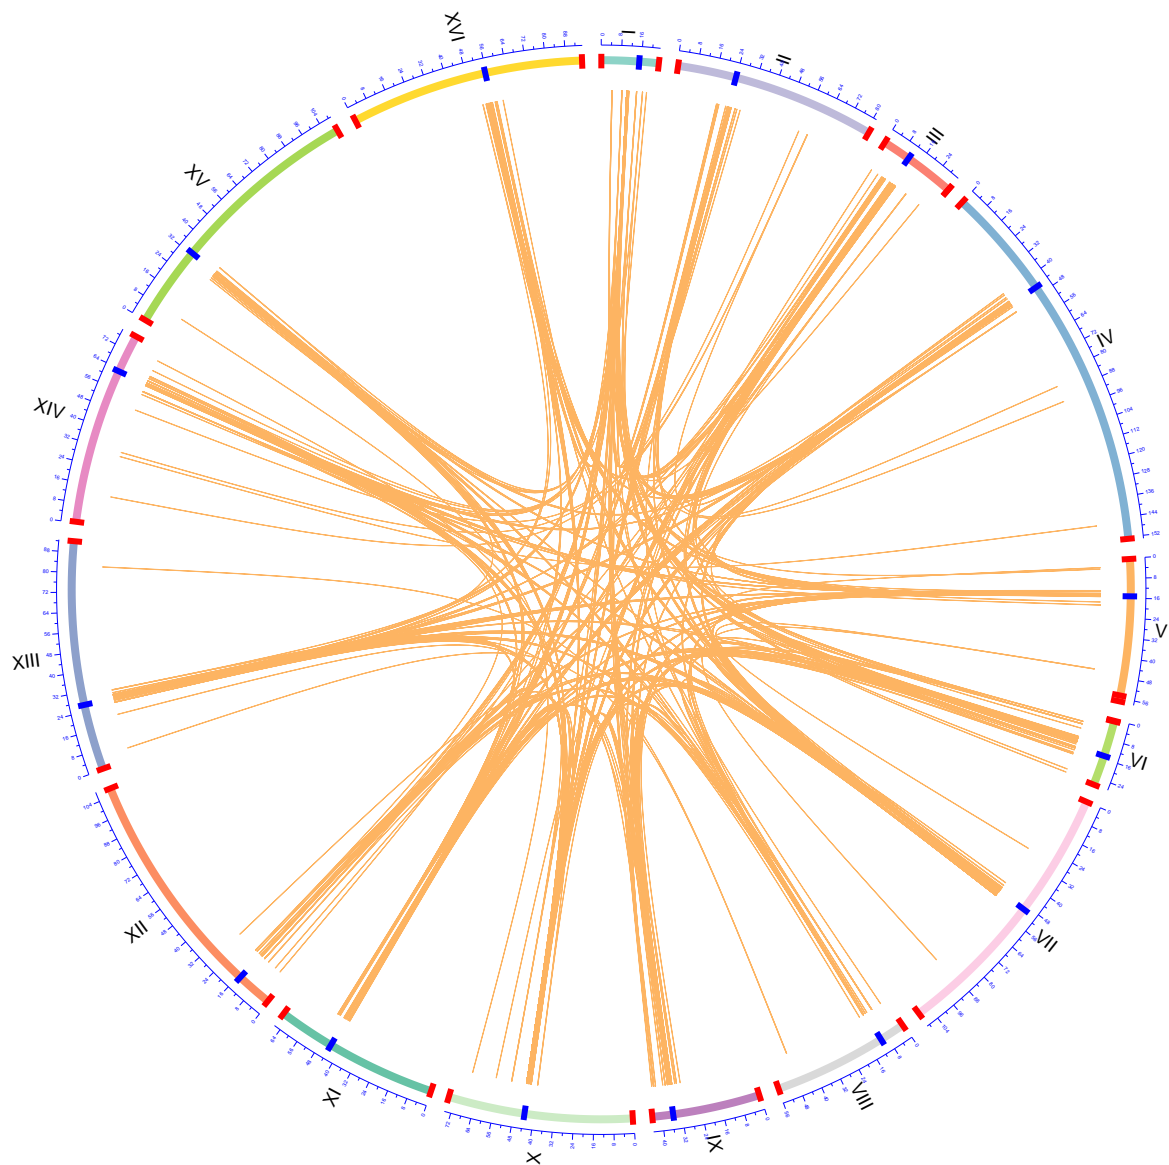

Supplement: Supplementary file 10 [file 13898870]

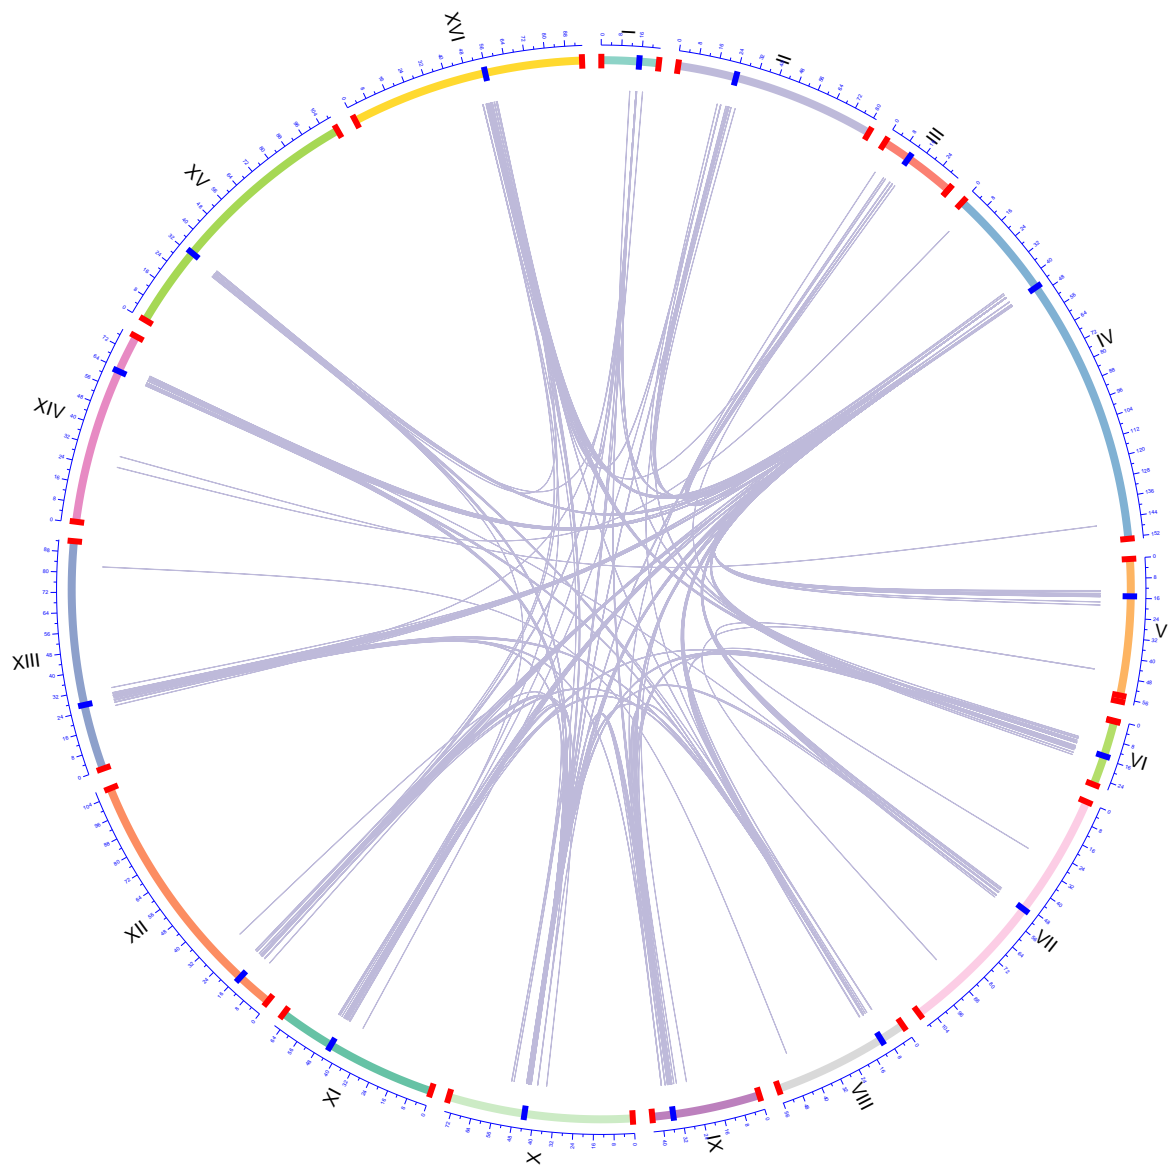

Supplement: Supplementary file 11 [file 13898870]

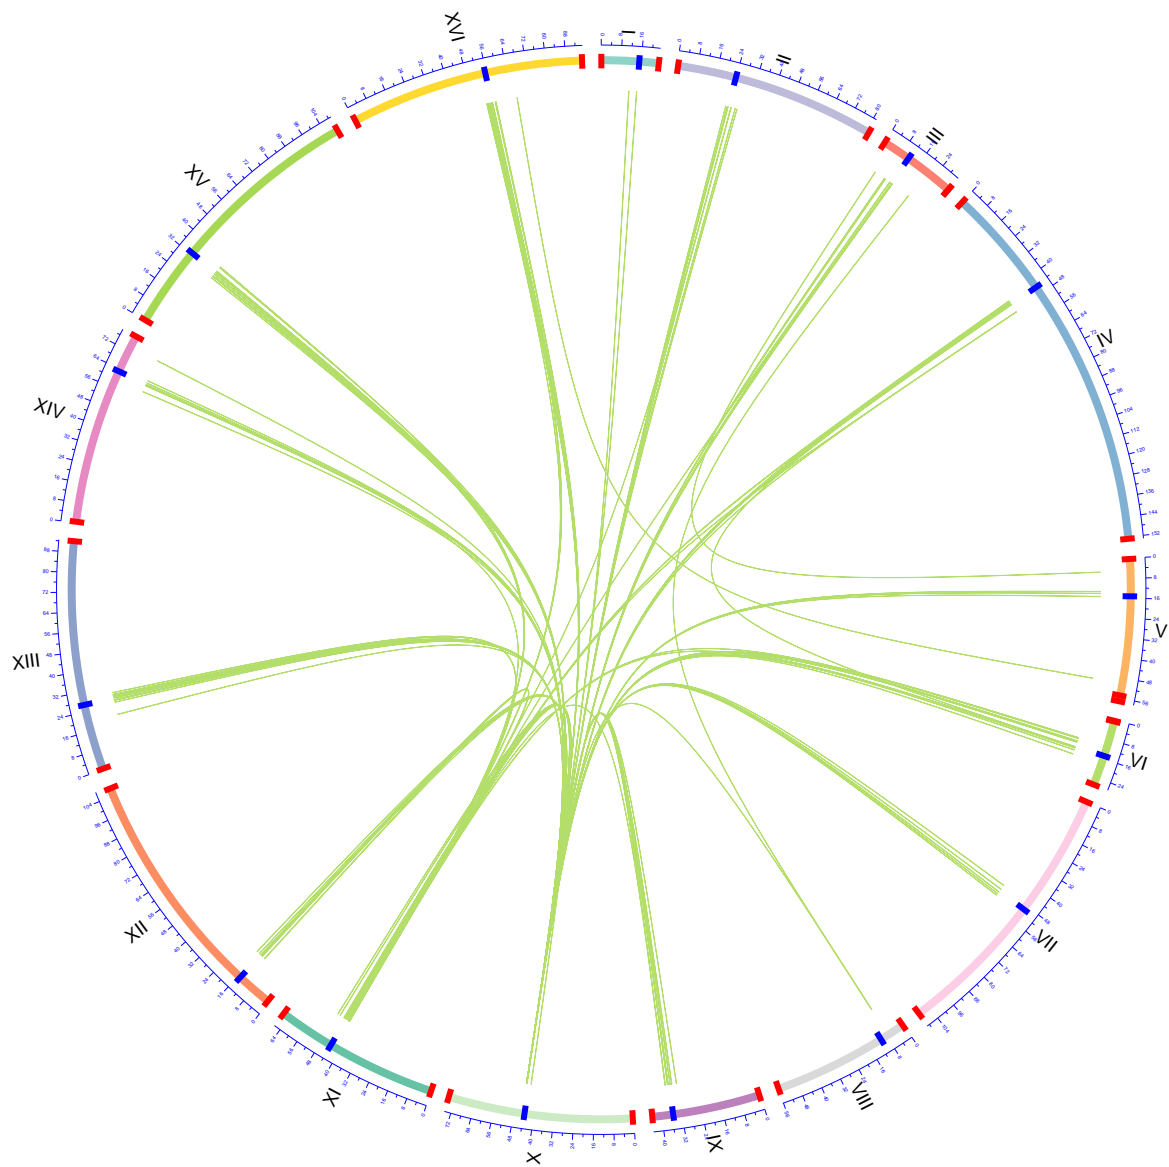

Supplement: Supplementary file 12 [file 13898870]

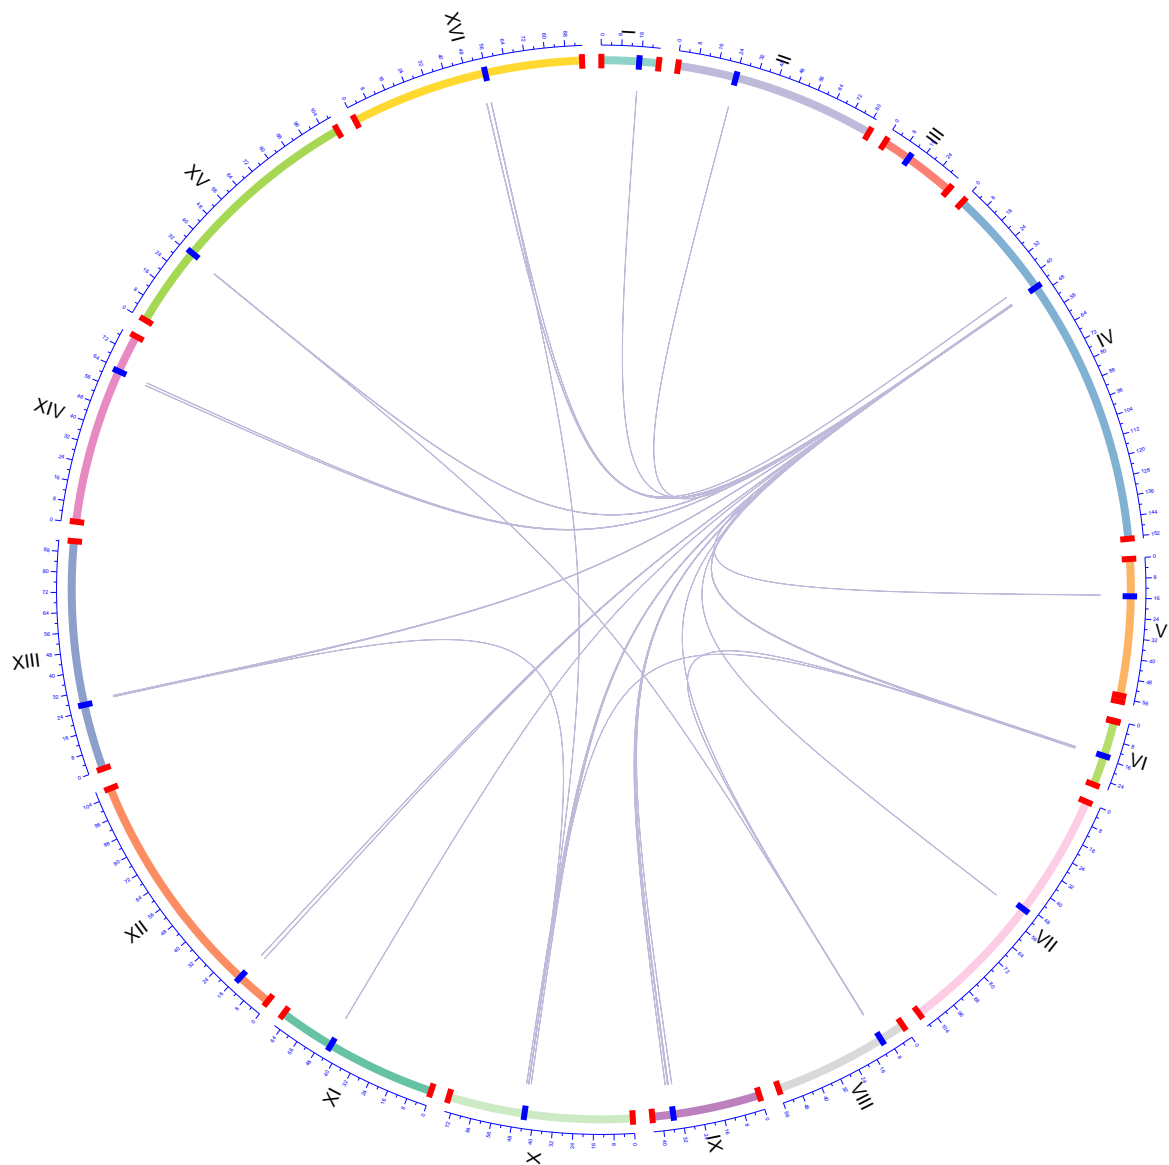

Supplement: Supplementary file 13 [file 13898870]

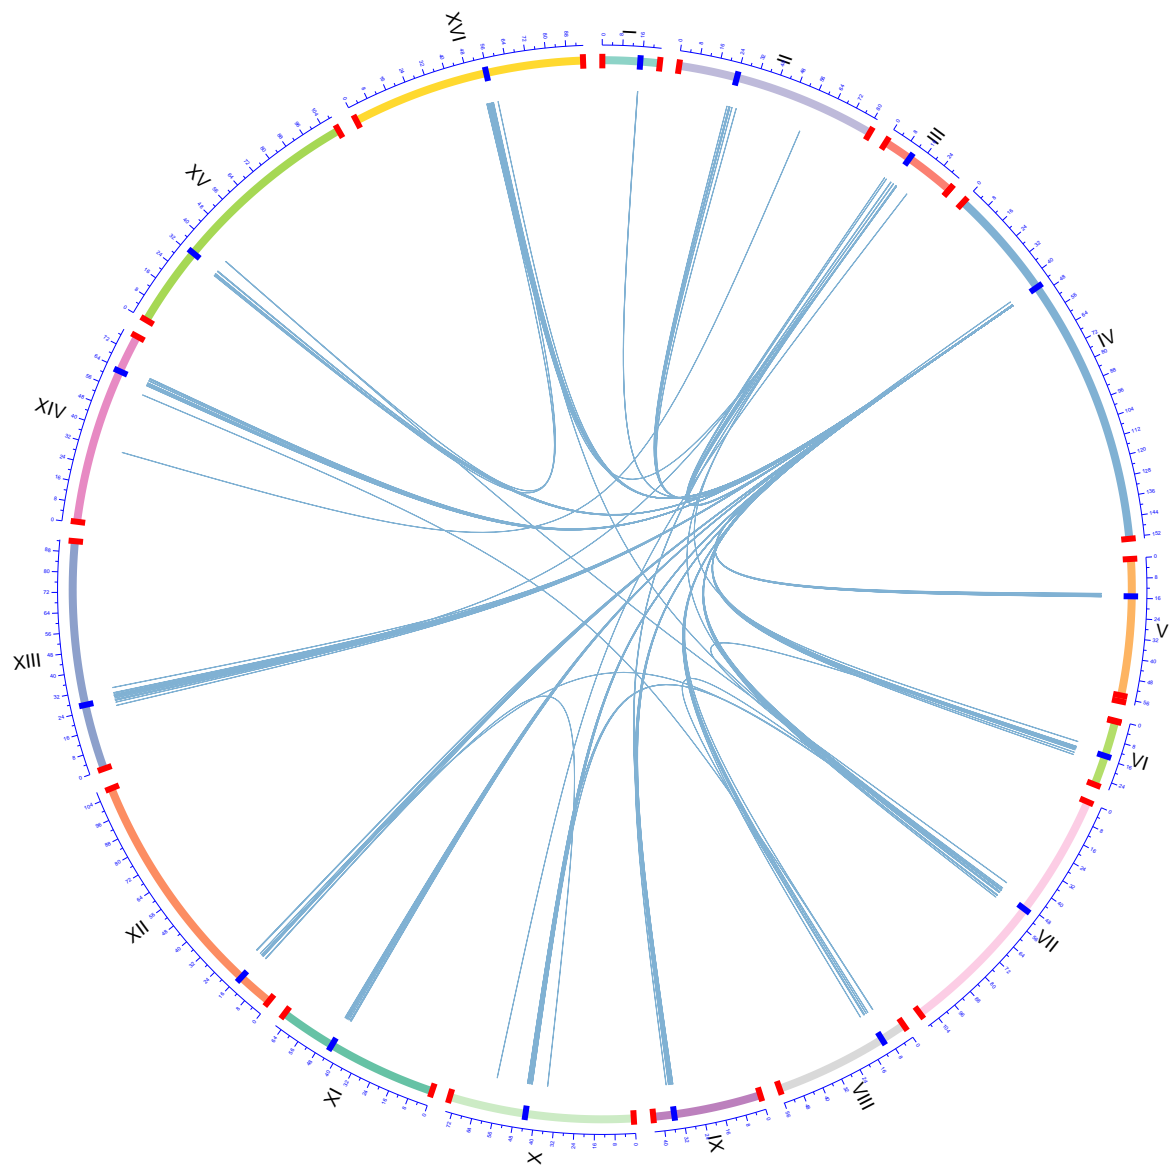

Supplement: Supplementary file 14 [file 13898870]

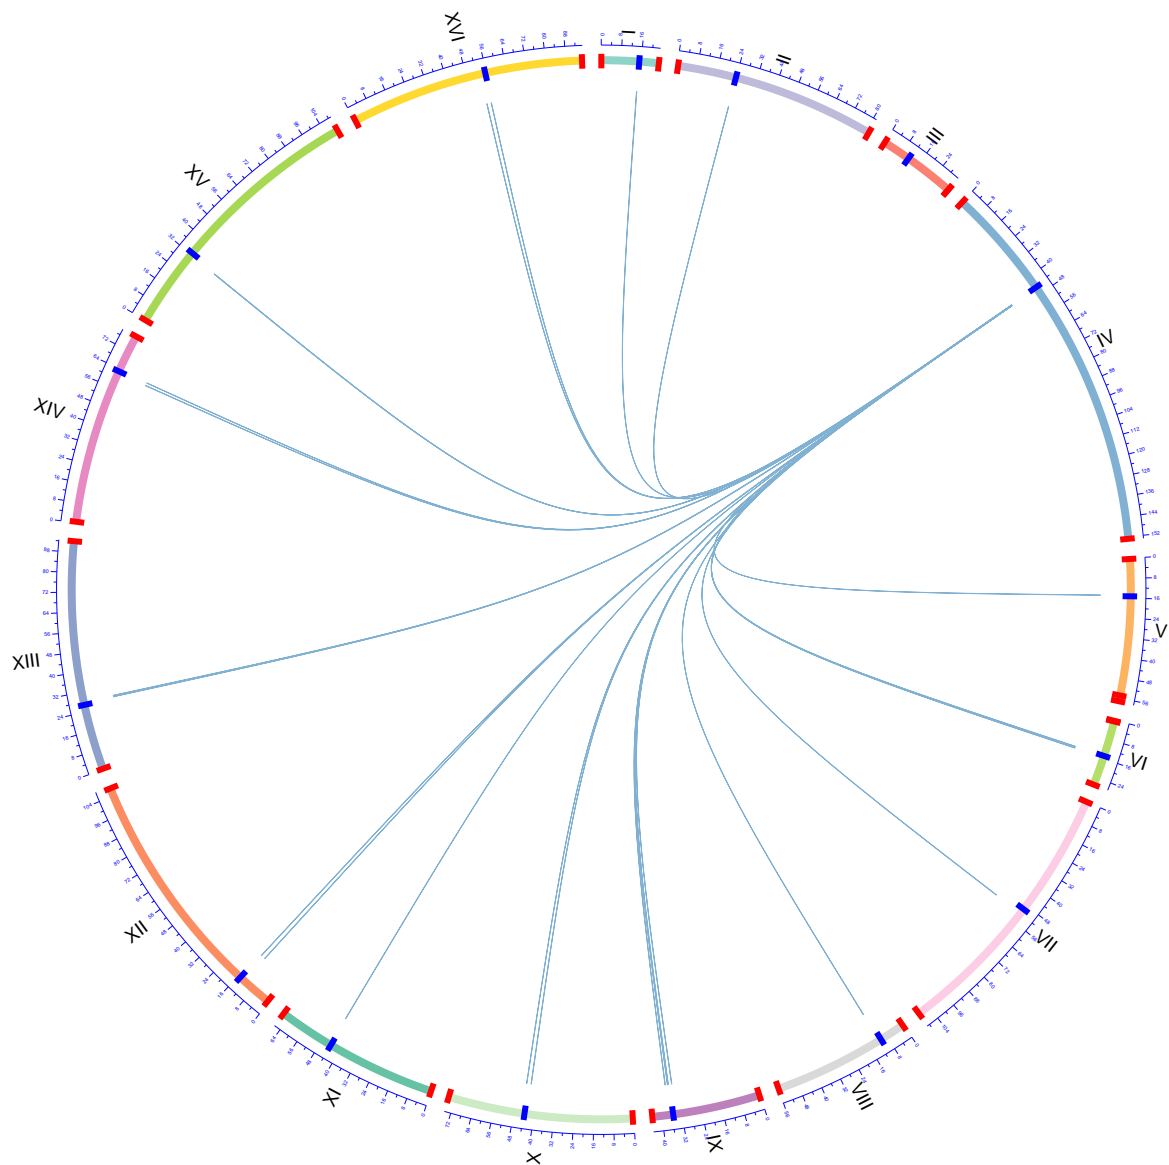

Supplement: Supplementary file 15 [file 13898870]

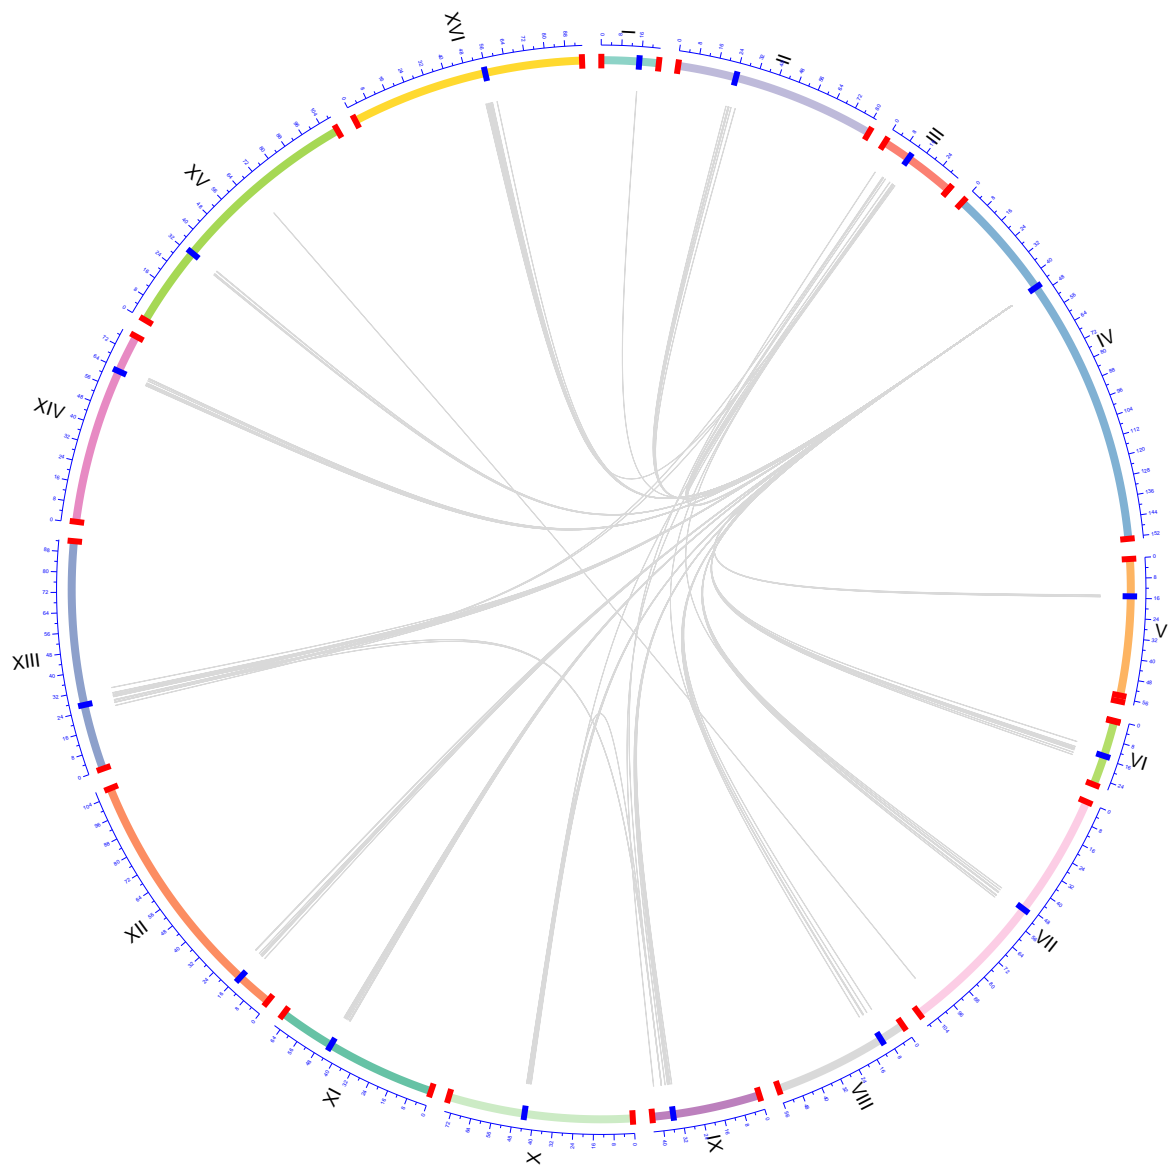

Supplement: Supplementary file 16 [file 13898870]

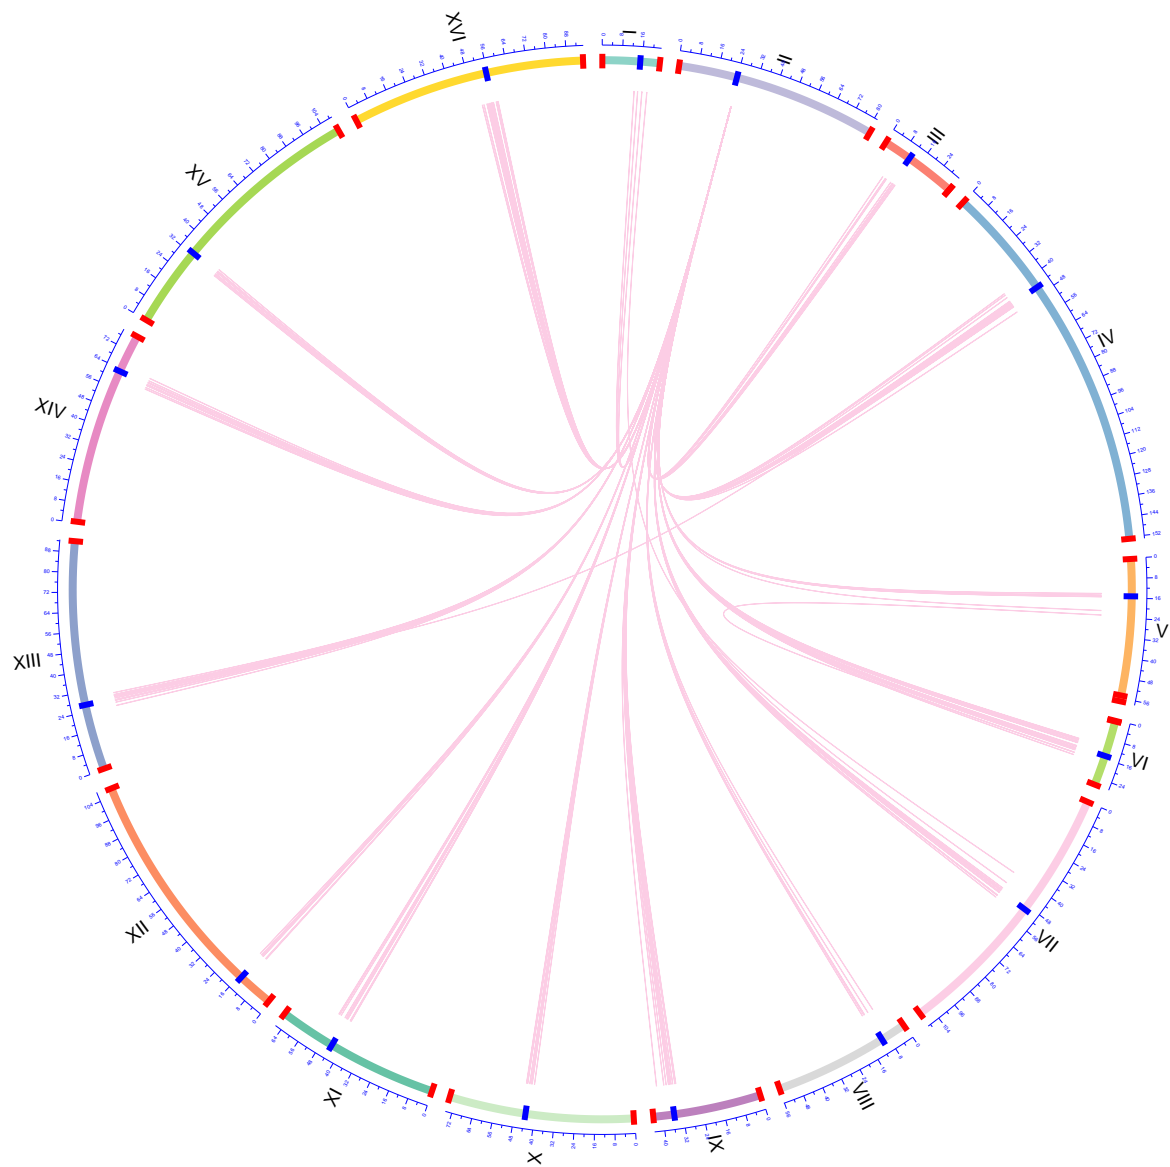

Supplement: Supplementary file 17 [file 13898870]

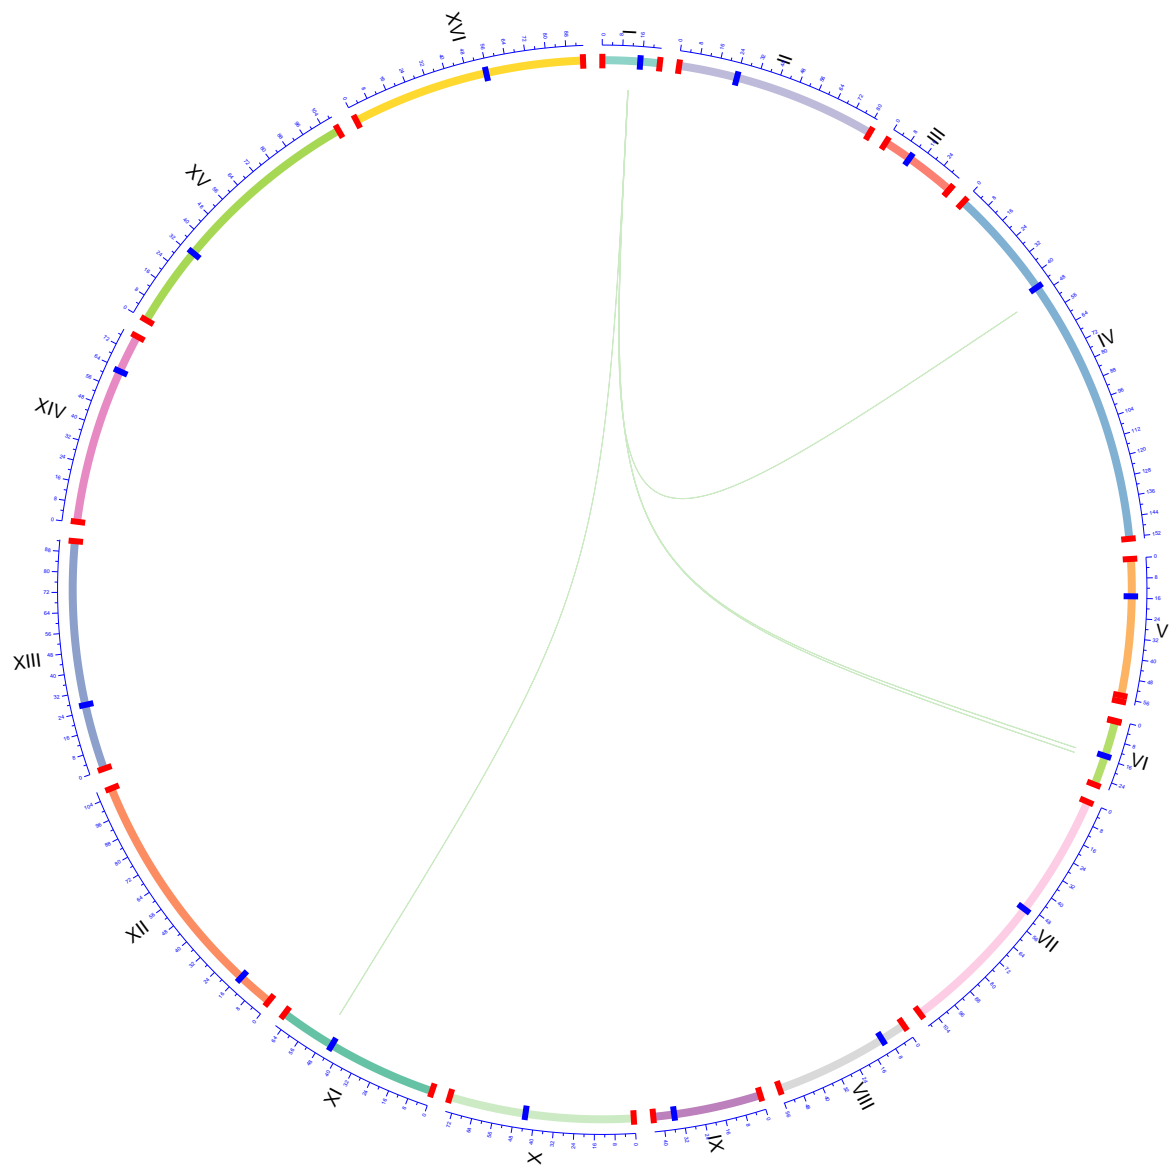

Supplement: Supplementary file 18 [file 13898870]

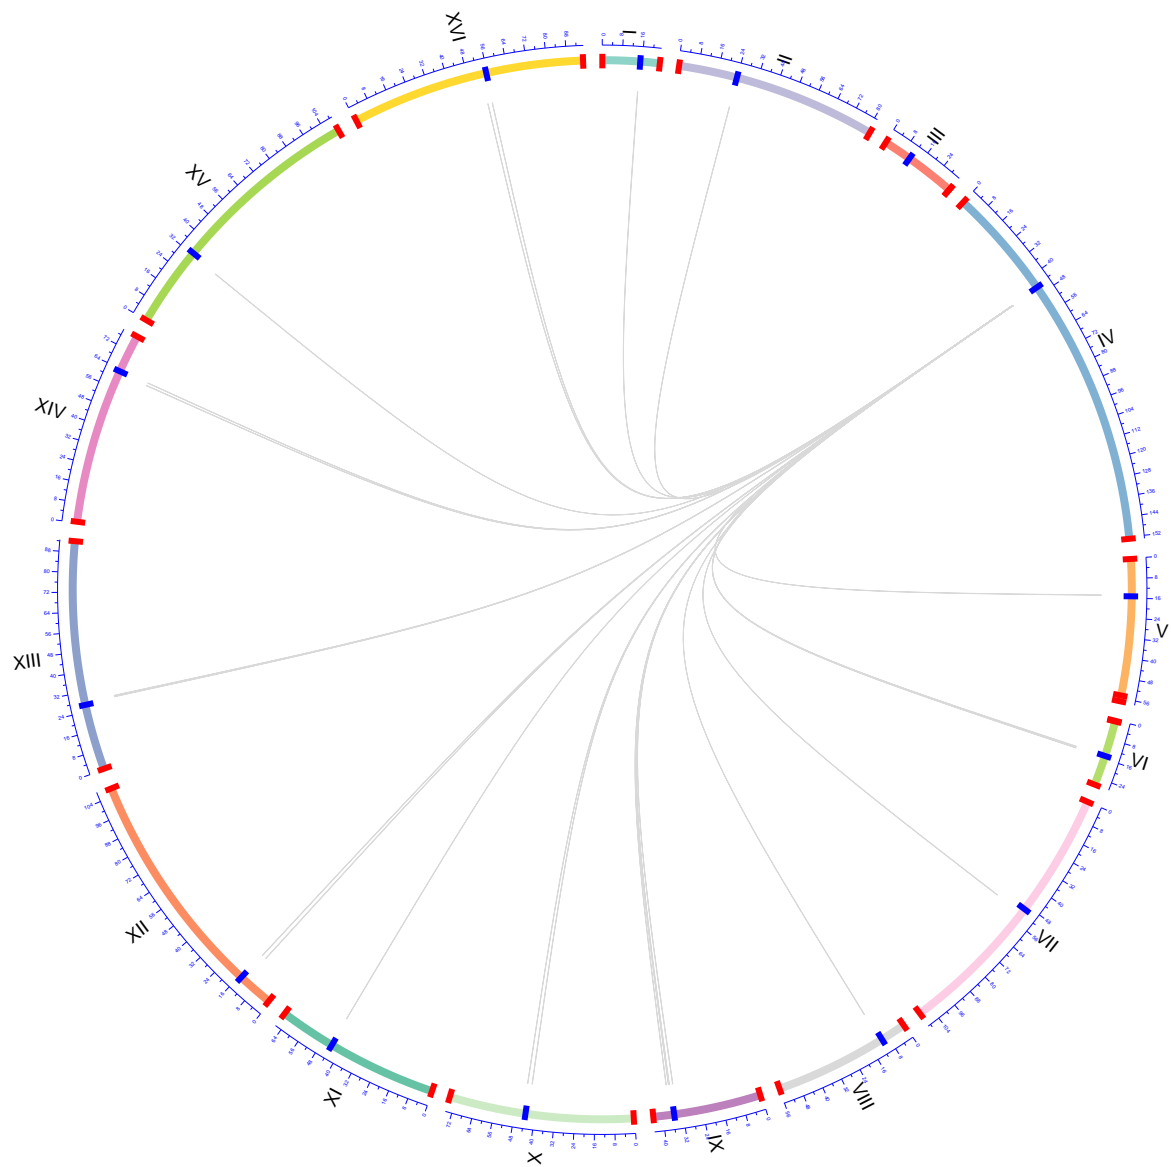

Supplement: Supplementary file 19 [file 13898870]

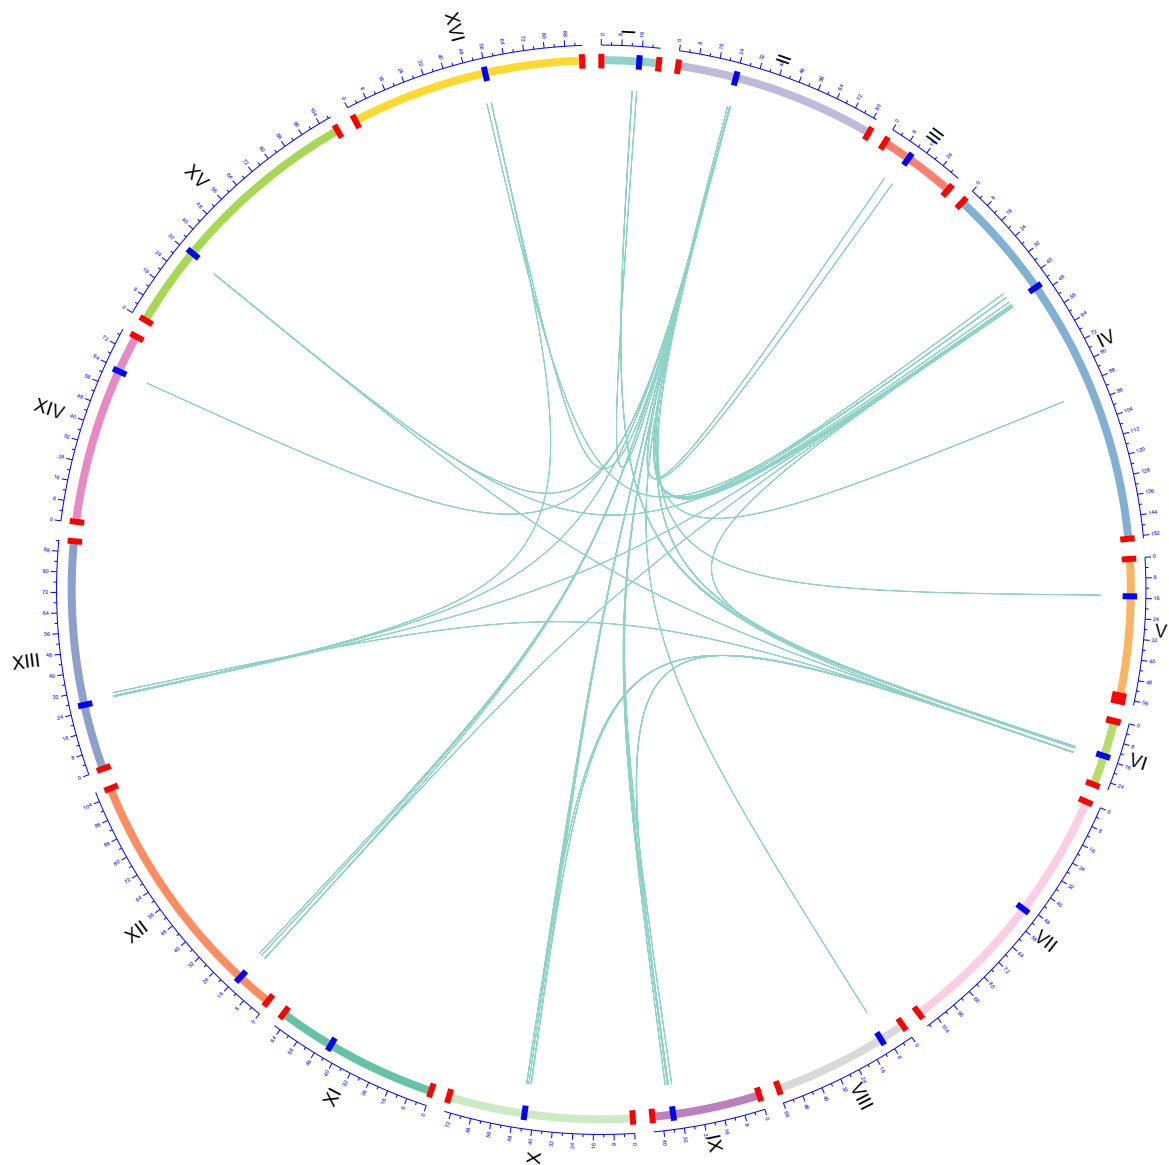

Supplement: Supplementary file 20 [file 13898870]
